# Supplementary material for: Three-dimensional CoS1.097/Al2O3 composites assembled with ultra-thin nanosheets for high-performance NOx gas sensing at room temperature
Source: Royal Society of Chemistry journal article supplement (doi:10.1039/d5nj00342c), 2025-01-01
Supplement: d5nj00342c1.pdf [file d5nj00342c1.pdf]

## Supplementary Information

### **Three-dimensional $\text{CoS}_{1.097}/\text{Al}_2\text{O}_3$ composites assembled with ultra-thin nanosheets for high-performance $\text{NO}_x$ gas sensing at room temperature**

Baihe Sun <sup>a,b</sup>, Jialing Xue <sup>b</sup>, Shanshan Cong <sup>b</sup>, Rui Zhang, <sup>c</sup>, Weixin Lv <sup>c</sup> and Keying Shi <sup>b\*</sup>

<sup>a</sup> School of Environmental and Chemical Engineering, Heilongjiang University of Science and Technology, Harbin 150022, PR China.

<sup>b</sup> Key Laboratory of Functional Inorganic Material Chemistry, Ministry of Education, School of Chemistry and Material Science, Heilongjiang University, Harbin, 150080, P. R. China.

<sup>c</sup> School of Chemistry and Chemical Engineering, Yancheng Institute of Technology, Yancheng 224051, China

\*Corresponding authors

E-mail: [shikeying2008@163.com](mailto:shikeying2008@163.com)

Fax: +86 4518667 3647

1. **Scheme 1** Schematic diagram of preparation of the 3D flower-like  $\text{CoS}_{1.097}/\text{Al}_2\text{O}_3$  composites.
2. **Fig. S1** Raman spectra of CAS-6 MFs.
3. **Fig. S2** AFM images and height of CA-LDH MFs.
4. **Fig. S3** AFM images and height of CAS-6 MFs.
5. **Fig. S4** SEM images (a), elemental mapping images (b–e), EDS analysis (f) of CAS-6.
6. **Fig. S5** TEM images of (a) CA, (b) CAS-6 and (c-d) HRTEM of CAS-6.
7. **Fig. S6** Dynamic response-recovery curve of (a) CA, (b) CAS-3 and (c) CAS-9 sensors.
8. **Fig. S7** The recovery times (a) and the response times (b) of CA, CAS-3, CAS-6 and CAS-9 sensors.
9. **Table S1** Comparison of the gas sensing characteristics of sulfide based materials reported in literature.
10. **Table S2** The binding energy of the different oxygen species in CA, CAS-6 before and after  $\text{NO}_x$  adsorption.
11. **Table S3** The contents of the different oxygen species in CA, CAS-6 before and after  $\text{NO}_x$  adsorption.
12. **Table S4** Responses, response times and recovery times of CA, CAS-3, CAS-6 and CAS-9 sensors.
13. **Table S5** The quantitative results of the of the CAS-6 on successive exposure (12 cycles) to 100 ppm  $\text{NO}_x$ .
14. **Table S6** The quantitative results of the stability for the CAS-6 to 100 ppm  $\text{NO}_x$  for 9 weeks.
15. **Table S7** The contents and binding energy of different sulfur species in CAS-6 before and after  $\text{NO}_x$  adsorption.

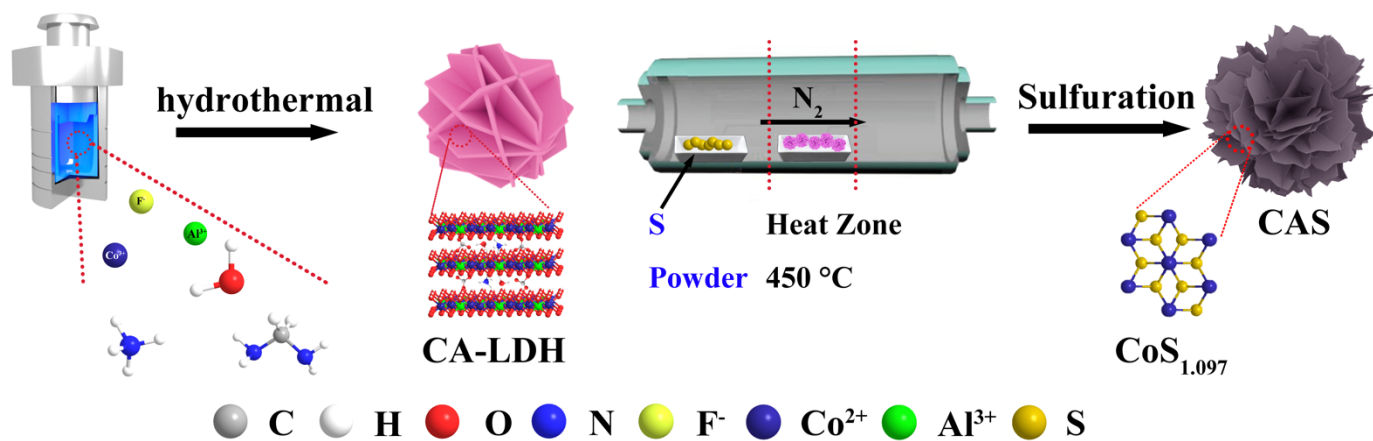

**Scheme 1** Schematic diagram of preparation of the 3D flower-like  $\text{CoS}_{1.097}/\text{Al}_2\text{O}_3$  composites.

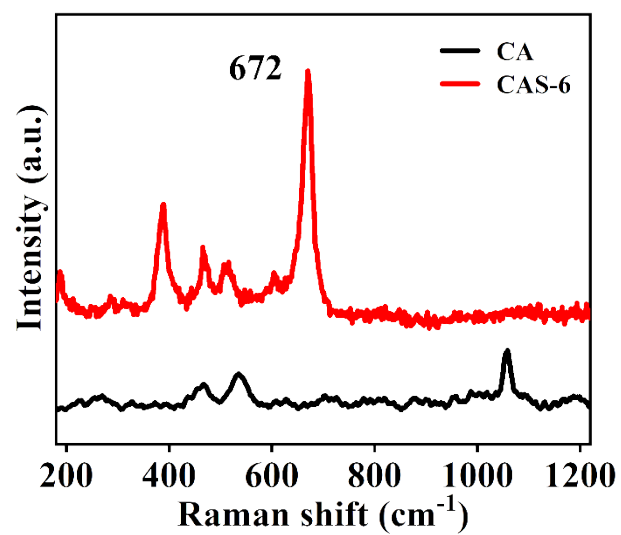

Fig. S1. Raman spectra of CAS-6 MFs.

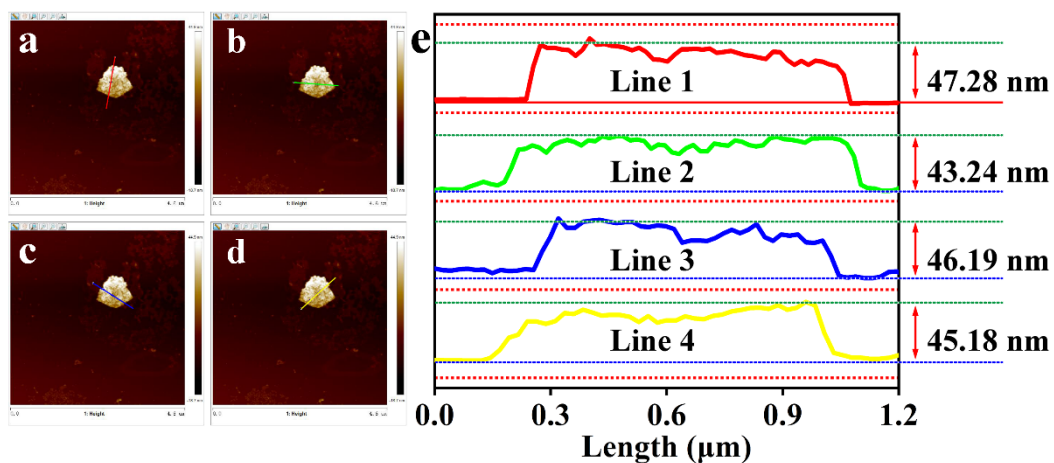

Fig. S2. AFM images and height of CA-LDH MFs.

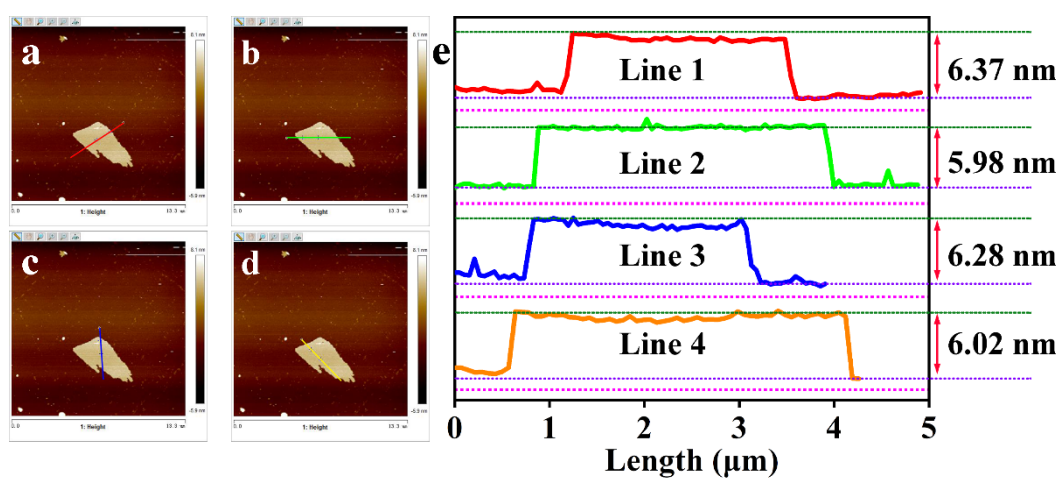

Fig. S3. AFM images and height of CAS-6 MFs.

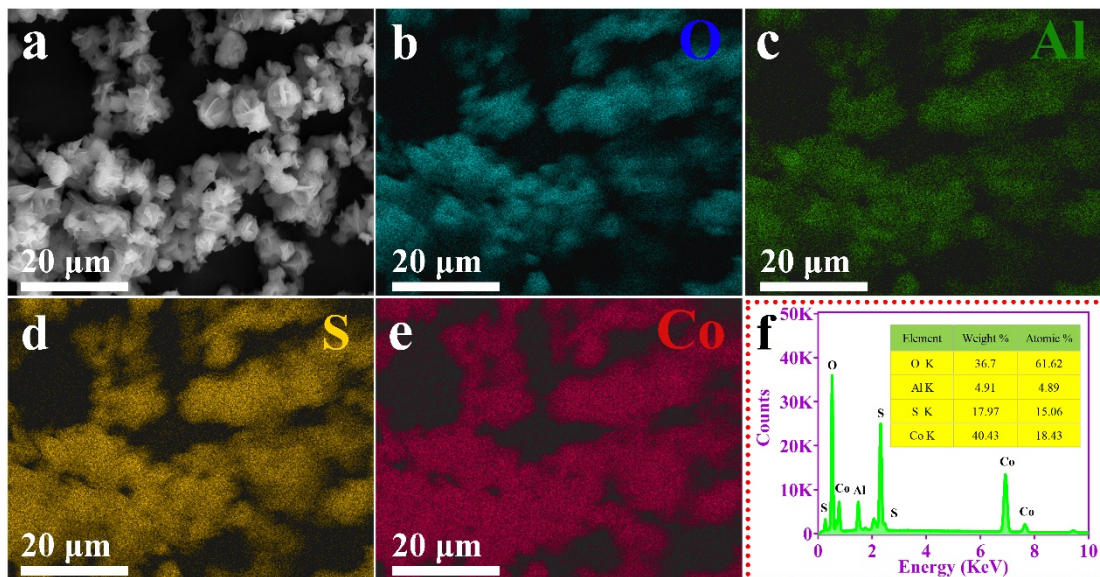

**Fig. S4.** SEM images (a), elemental mapping images (b–e), EDS analysis (f) of CAS-6.

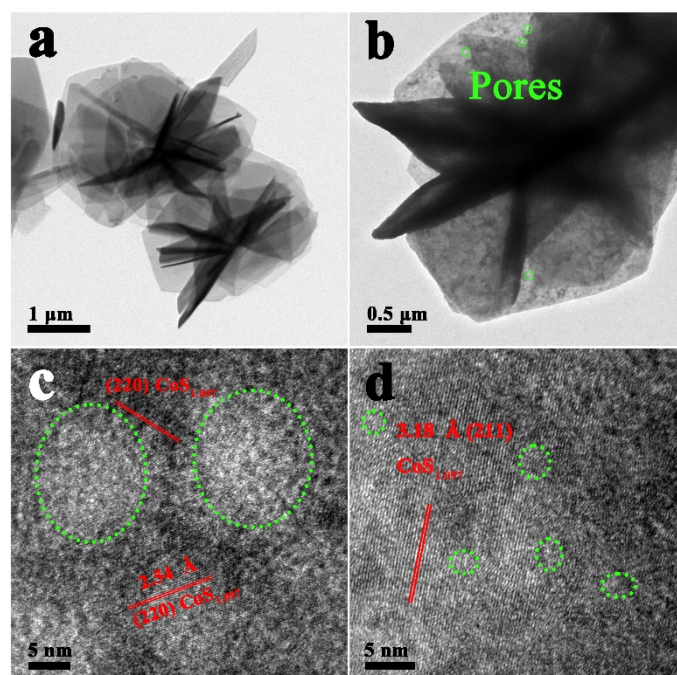

**Fig. S5.** TEM images of (a) CA, (b) CAS-6 and (c-d) HRTEM of CAS-6.

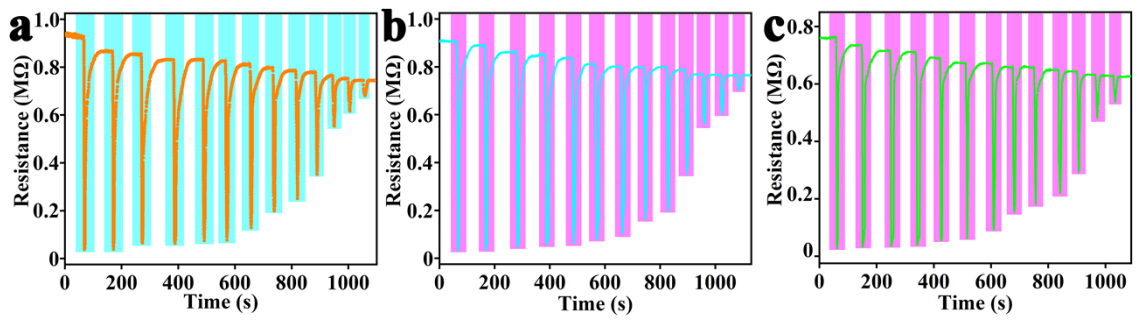

**Fig. S6.** Dynamic response-recovery curve of (a) CA, (b) CAS-3 and (c) CAS-9 sensors.



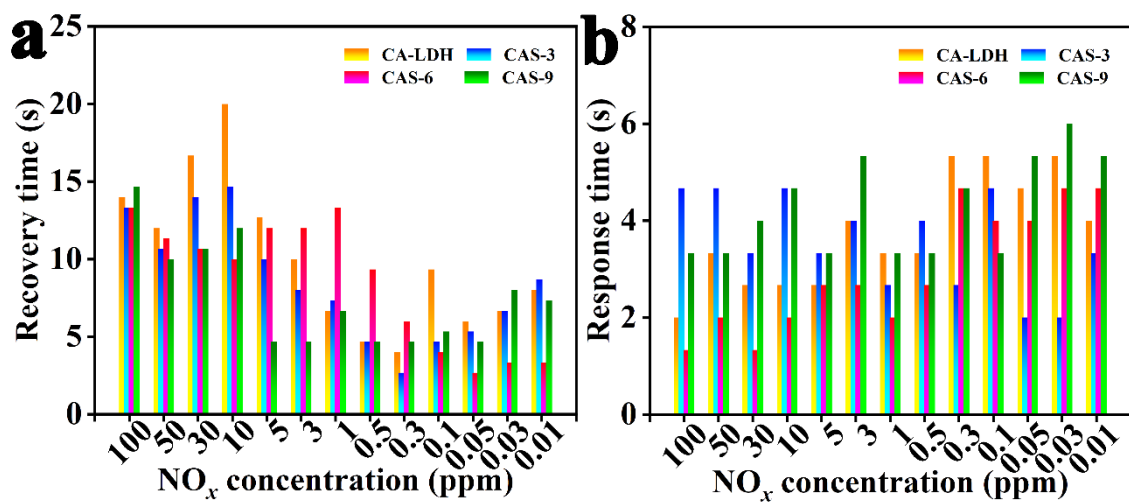

Fig. S7. The recovery times (a) and the response times (b) of CA, CAS-3, CAS-6 and CAS-9 sensors.

**Table S1.** Comparison of the gas sensing characteristics of Sulfide based materials reported in literature.

| Sensor material                                                                      | Operation temperature | Gas                   | Response/<br>concentration | Response/<br>recovery time<br>(s) | limit of<br>detection | References       |
|--------------------------------------------------------------------------------------|-----------------------|-----------------------|----------------------------|-----------------------------------|-----------------------|------------------|
| p-NiS/n-In <sub>2</sub> O <sub>3</sub>                                               | 300°C                 | ethanol               | 10.3/<br>100 ppm           | 8 s/<br>20 s                      | 5 ppm                 | <b>12</b>        |
| MoS <sub>2</sub> -Bi <sub>2</sub> O <sub>3</sub> -Bi <sub>2</sub> S <sub>3</sub> NMs | RT                    | NO <sub>x</sub>       | 10.7/<br>50 ppm            | 1 s/--                            | 50 ppb                | <b>16</b>        |
| MoS <sub>2</sub> @WS <sub>2</sub>                                                    | RT                    | NO <sub>2</sub>       | 26.12/<br>50 ppm           | 1.6 s/<br>27.7 s                  | 10 ppb                | <b>17</b>        |
| Mn-SnS                                                                               | RT                    | acetone               | 1.107/<br>500 ppb          | 3 s/<br>4 s                       | 500 ppb               | <b>18</b>        |
| MoS <sub>2</sub> @SnO <sub>2</sub><br>heterostructure                                | RT                    | NO <sub>2</sub>       | 34.67/<br>100 ppm          | 2.2 s/<br>10.54 s                 | 10 ppb                | <b>51</b>        |
| n-MoS <sub>2</sub> /<br>p-CuO                                                        | RT                    | NH <sub>3</sub>       | 47%/<br>500 ppm            | 17 s/26 s                         | 5 ppm                 | <b>S1</b>        |
| Au-decorated WS <sub>2</sub>                                                         | RT                    | CO                    | 1.48/<br>50 ppm            | --/--                             | 0.2 ppm               | <b>S2</b>        |
| CdS QDs<br>/Co <sub>3</sub> O <sub>4</sub>                                           | RT                    | H <sub>2</sub> S      | 12.7/<br>100 ppm           | 0.6 s/<br>1.0s                    | 1-5 ppm               | <b>S3</b>        |
| CNFs/CoS <sub>2</sub> /MoS <sub>2</sub>                                              | RT                    | NO                    | 32%/<br>60 ppm             | --/--                             | 1 ppm                 | <b>S4</b>        |
| Co <sub>9</sub> S <sub>8</sub> sensor                                                | 160°C                 | ethanol               | 7.326/<br>100 ppm          | 1 s/<br>15 s                      | --                    | <b>S5</b>        |
| <b>CAS-6</b>                                                                         | <b>RT</b>             | <b>NO<sub>x</sub></b> | <b>30.05/<br/>100 ppm</b>  | <b>1.3s/<br/>13.3s</b>            | <b>10 ppb</b>         | <b>This work</b> |

**Table S2.** The binding energy position of the different oxygen species in CA and CAS-6 before and after NO<sub>x</sub> adsorption.

| <b>Oxygen species</b>      | <b>CA</b> | <b>CAS-6</b> | <b>CAS-NO<sub>x</sub></b> |
|----------------------------|-----------|--------------|---------------------------|
| <b>Lattice oxygens</b>     | 531.9     | 531.8        | 531.8                     |
| <b>Oxygen defects</b>      | 532.7     | 532.5        | 532.6                     |
| <b>Chemisorbed oxygens</b> | 534.2     | 533.4        | 533.5                     |

**Table S3.** The contents of the different oxygen species in CA and CAS-6 before and after NO<sub>x</sub> adsorption.

| <b>Oxygen species</b>      | <b>CA</b> | <b>CAS-6</b> | <b>CAS-NO<sub>x</sub></b> |
|----------------------------|-----------|--------------|---------------------------|
| <b>Lattice oxygens</b>     | 54.7%     | 44.4%        | 46.4%                     |
| <b>Oxygen defects</b>      | 26.3%     | 31.9%        | 25.7%                     |
| <b>Chemisorbed oxygens</b> | 19.0%     | 23.7%        | 27.9%                     |

**Table S4.** Response, response time and recovery time of CA, CAS-3, CAS-6 and CAS-9 sensors.

| <b>Sensors</b> | <b>CA</b>                   |          |           | <b>CAS-3</b> |          |           | <b>CAS-6</b> |             |              | <b>CAS-9</b> |          |           |
|----------------|-----------------------------|----------|-----------|--------------|----------|-----------|--------------|-------------|--------------|--------------|----------|-----------|
|                | <b>NO<sub>x</sub> (ppm)</b> | <b>R</b> | <b>Ts</b> | <b>Tr</b>    | <b>R</b> | <b>Ts</b> | <b>Tr</b>    | <b>R</b>    | <b>Ts</b>    | <b>Tr</b>    | <b>R</b> | <b>Ts</b> |
| <b>100</b>     | 25.04                       | 2.00     | 14.00     | 27.21        | 4.67     | 13.33     | <b>30.05</b> | <b>1.33</b> | <b>13.33</b> | 27.22        | 3.33     | 14.67     |
| <b>50</b>      | 22.53                       | 3.33     | 12.00     | 25.71        | 4.67     | 10.67     | <b>27.25</b> | <b>2.00</b> | <b>11.33</b> | 21.85        | 3.33     | 10.00     |
| <b>30</b>      | 13.15                       | 2.67     | 16.67     | 17.98        | 3.33     | 14.00     | <b>22.54</b> | <b>1.33</b> | <b>10.67</b> | 19.57        | 4.00     | 10.67     |
| <b>10</b>      | 13.09                       | 2.67     | 20.00     | 15.03        | 4.67     | 14.67     | <b>18.81</b> | <b>2.00</b> | <b>10.00</b> | 17.69        | 4.67     | 12.00     |
| <b>5</b>       | 11.09                       | 2.67     | 12.67     | 13.13        | 3.33     | 10.00     | <b>15.46</b> | <b>2.67</b> | <b>12.00</b> | 12.46        | 3.33     | 4.67      |
| <b>3</b>       | 10.75                       | 4.00     | 10.00     | 10.49        | 4.00     | 8.00      | <b>11.32</b> | <b>2.67</b> | <b>12.00</b> | 10.63        | 5.33     | 4.67      |
| <b>1</b>       | 6.28                        | 3.33     | 6.67      | 7.72         | 2.67     | 7.33      | <b>8.28</b>  | <b>2.00</b> | <b>13.33</b> | 7.25         | 3.33     | 6.67      |
| <b>0.5</b>     | 4.01                        | 3.33     | 4.67      | 4.91         | 4.00     | 4.67      | <b>6.83</b>  | <b>2.67</b> | <b>9.33</b>  | 4.26         | 3.33     | 4.67      |
| <b>0.3</b>     | 3.12                        | 5.33     | 4.00      | 4.03         | 2.67     | 2.67      | <b>5.13</b>  | <b>4.67</b> | <b>6.00</b>  | 3.59         | 4.67     | 4.67      |
| <b>0.1</b>     | 2.21                        | 5.33     | 9.33      | 2.22         | 4.67     | 4.67      | <b>3.80</b>  | <b>4.00</b> | <b>4.00</b>  | 2.95         | 3.33     | 5.33      |
| <b>0.05</b>    | 1.38                        | 4.67     | 6.00      | 1.38         | 2.00     | 5.33      | <b>2.27</b>  | <b>4.00</b> | <b>2.67</b>  | 2.19         | 5.33     | 4.67      |
| <b>0.03</b>    | 1.22                        | 5.33     | 6.67      | 1.27         | 2.00     | 6.67      | <b>1.46</b>  | <b>4.67</b> | <b>3.33</b>  | 1.31         | 6.00     | 8.00      |
| <b>0.01</b>    | 1.09                        | 4.00     | 8.00      | 1.08         | 3.33     | 8.67      | <b>1.22</b>  | <b>4.67</b> | <b>3.33</b>  | 1.17         | 5.33     | 7.33      |

\***R:** Response **Ts:** Response time **Tr:** Recovery time

**Table S5.** The quantitative results of the of the CAS-6 on successive exposure (12 cycles) to 100 ppm NO<sub>x</sub>.

| Cycles                                         | 1     | 2     | 3     | 4     | 5     | 6     | 7     | 8     | 9     | 10    | 11    | 12    |
|------------------------------------------------|-------|-------|-------|-------|-------|-------|-------|-------|-------|-------|-------|-------|
| Gas response (R <sub>0</sub> /R <sub>g</sub> ) | 30.06 | 30.01 | 29.46 | 29.98 | 29.89 | 28.87 | 29.46 | 28.32 | 28.56 | 28.12 | 28.52 | 28.41 |

\*RSD value = 2.6% (RSD: Relative Standard Deviation).

**Table S6.** The quantitative results of the stability for the CAS-6 to 100 ppm NO<sub>x</sub> for 9 weeks.

| Weeks                                          | 1     | 2     | 3     | 4     | 5     | 6     | 7     | 8     | 9     |
|------------------------------------------------|-------|-------|-------|-------|-------|-------|-------|-------|-------|
| Gas response (R <sub>0</sub> /R <sub>g</sub> ) | 30.02 | 30.05 | 30.00 | 29.83 | 29.95 | 29.76 | 30.02 | 30.01 | 29.99 |

**Table S7.** The contents and binding energy positions of different sulfur species in CAS-6 before and after NO<sub>x</sub> adsorption.

| <b>Sulfur species</b>    | <b>CAS-6</b>         |                    | <b>CAS-NO<sub>x</sub></b> |                    |
|--------------------------|----------------------|--------------------|---------------------------|--------------------|
|                          | <b>Position (eV)</b> | <b>Content (%)</b> | <b>Position (eV)</b>      | <b>Content (%)</b> |
| <b>S-Co</b>              | 163.0                | 14.4               | 161.8                     | 6.4                |
| <b>S2p<sub>3/2</sub></b> | 169.0                | 49.2               | 168.9                     | 34.1               |
| <b>S2p<sub>1/2</sub></b> | 170.1                | 28.3               | 170.1                     | 37.6               |
| <b>Satellite peak</b>    | 176.1                | 8.1                | 174.1                     | 21.9               |

## References

- S1.** S. Sharma, A. Kumar, N. Singh and D. Kaur, *Sensor. Actuator. B Chem.*, 2018, **275**, 499-507.
- S2.** J.H. Kim, A. Mirzaeib, H.W. Kimb and S.S. Kim, *Sensor. Actuator. B Chem.*, 2019, **296**, 126659.
- S3.** M.H. Dun, J.F. Tan, W.H. Tan, M.H. Tang and X.T. Huang, *Sensor. Actuator. B Chem.*, **2019**, 298, 126839.
- S4.** S. Hou, R. Pang, S. Chang, L. Ye, J. Xu, X. Wang, Y. Zhang, Y. Shang and A. Cao, *ACS Appl. Mater. Interfaces.*, 2020, **12**, 29778-29786.
- S5.** Y. Qiu and Y. Wang, *Appl. Surf. Sci.*, 2022, **585**, 152764.
